# Supplementary material for: The role of the sextet potential energy surface in O2 + N inelastic collision processes
Source: Royal Society of Chemistry journal article supplement (doi:10.1039/d2cp05329b), 2023-01-01
Supplement: d2cp05329b1.pdf [file d2cp05329b1.pdf]

## Supplementary Materials

### The Role of the Sextet Potential Energy Surface in O<sub>2</sub> + N Inelastic Collisions Processes

Xia Huang<sup>a</sup> and Xin-lu Cheng<sup>\*ab</sup>

<sup>a</sup>Institute of Atomic and Molecular Physics, Sichuan University, Chengdu 610065, China

<sup>b</sup>Key Laboratory of High Energy Density Physics and Technology of Ministry of Education, Sichuan University, Chengdu 610065, China

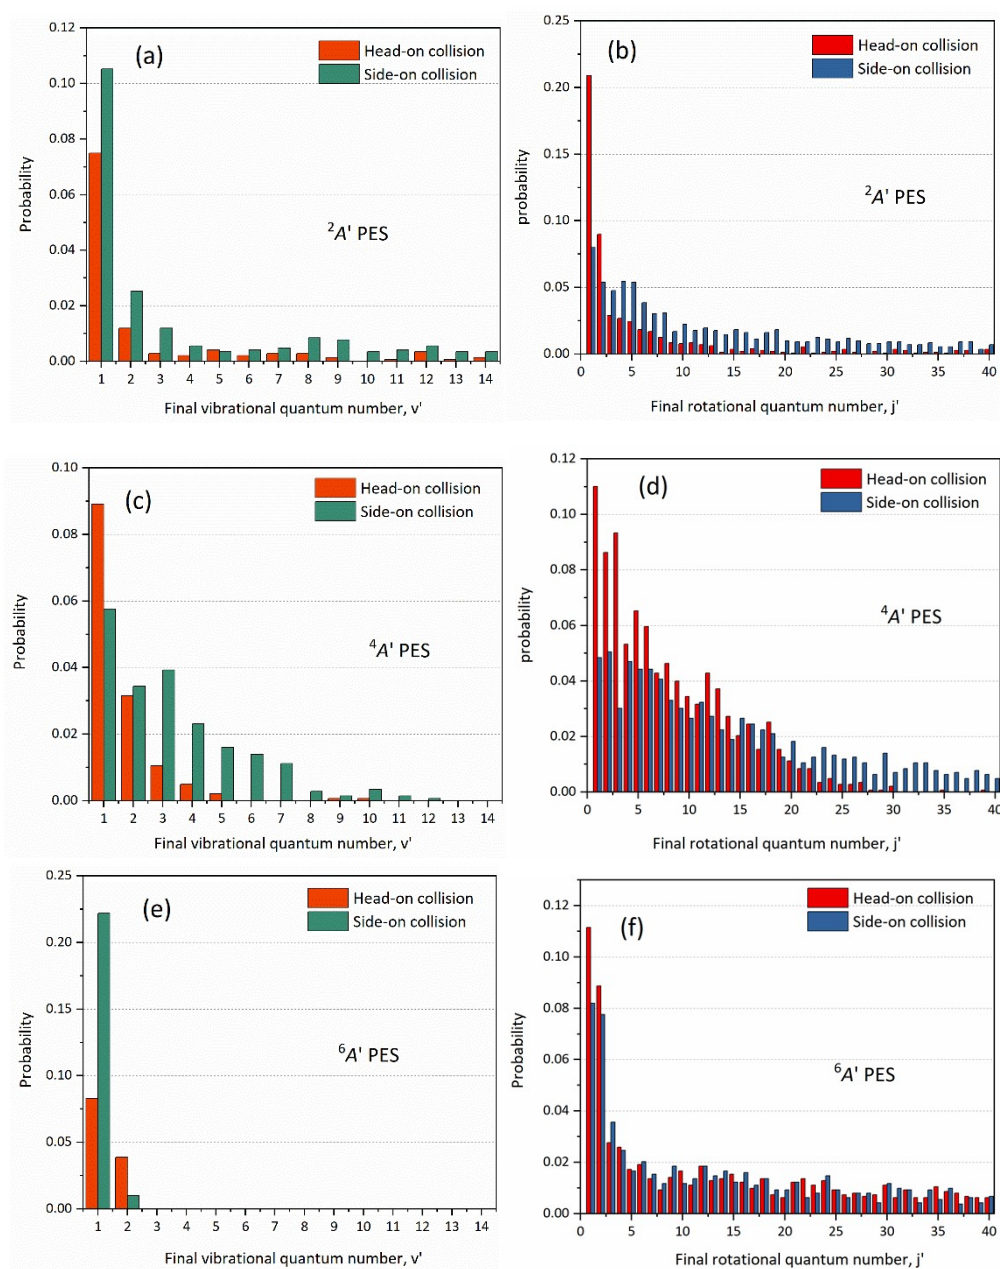

Figure. S1. Comparison of rovibrational distribution for the final states separately on <sup>2</sup>A', <sup>4</sup>A' and <sup>6</sup>A' PESs after head-on and side-on collisions (collision energy = 5eV).
